# Supplementary material for: Self-powered infrared detection using a graphene oxide film
Source: Royal Society of Chemistry journal article supplement (doi:10.1039/c9ta13830g), 2020-01-01
Supplement: c9ta13830g1.pdf [file c9ta13830g1.pdf]

Supporting Information

# Self-powered Infrared Detection Using a Graphene Oxide Film

Zhiying Wang,<sup>‡</sup> Qingchen Shen,<sup>‡</sup> Jingyi Zhang, Modi Jiang, Wenlong Chen, Peng Tao, Chengyi Song, Benwei Fu, Tao Deng\* and Wen Shang\*

State Key Laboratory of Metal Matrix Composites, School of Materials Science and Engineering, Shanghai Jiao Tong University, Shanghai 200240, P. R. China

\*E-mail: dengtao@sjtu.edu.cn; shangwen@sjtu.edu.cn

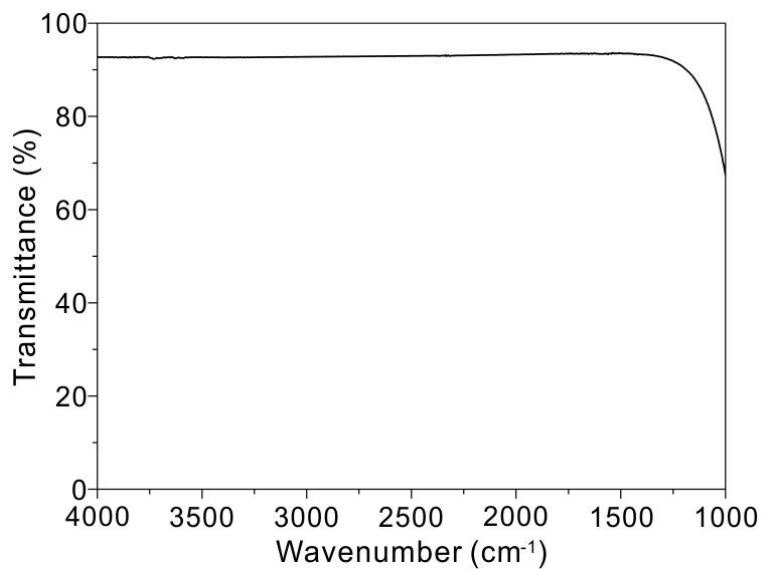

**Fig. S1.** FTIR transmittance spectrum of the CaF<sub>2</sub> window.

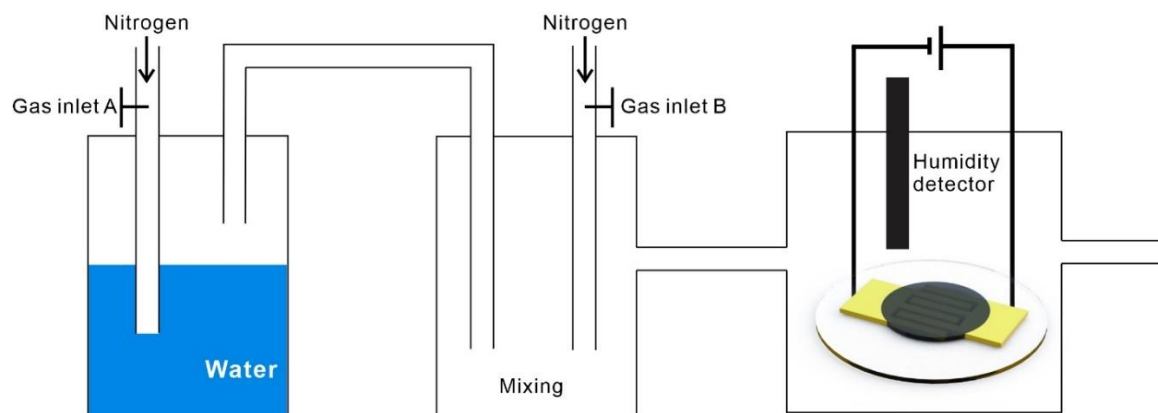

**Fig. S2.** Schematic of experimental set-up for preparing the g-GOF.

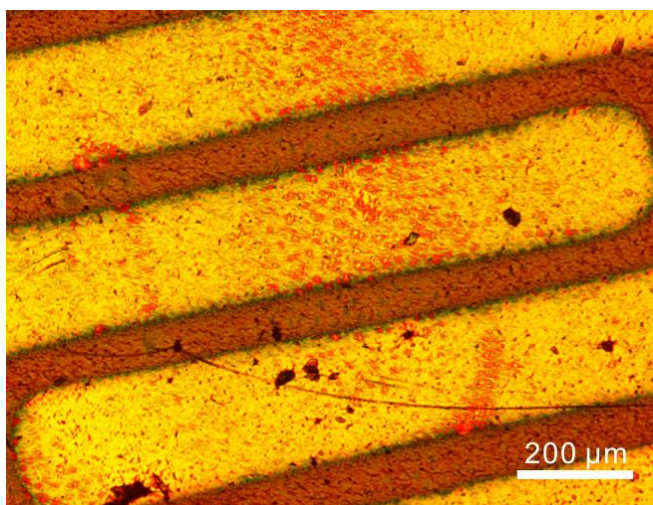

**Fig. S3.** Optical image of interdigitated Au electrodes (bright yellow) covered with a GOF.

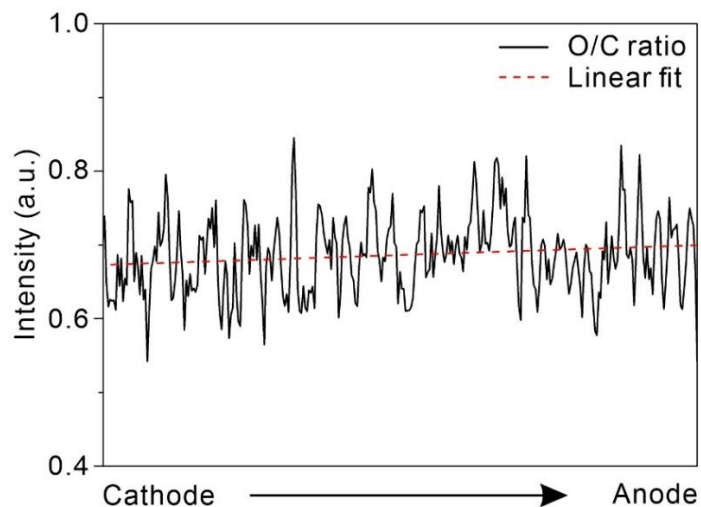

**Fig. S4.** Line scan EDS spectra of O/C atomic ratio of the GOF between two Au electrodes.

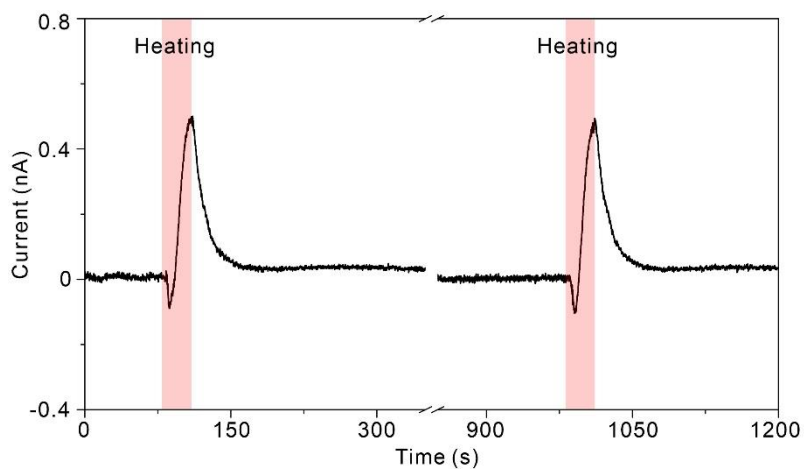

**Fig. S5.** Electric response of the device to a resistance heater.

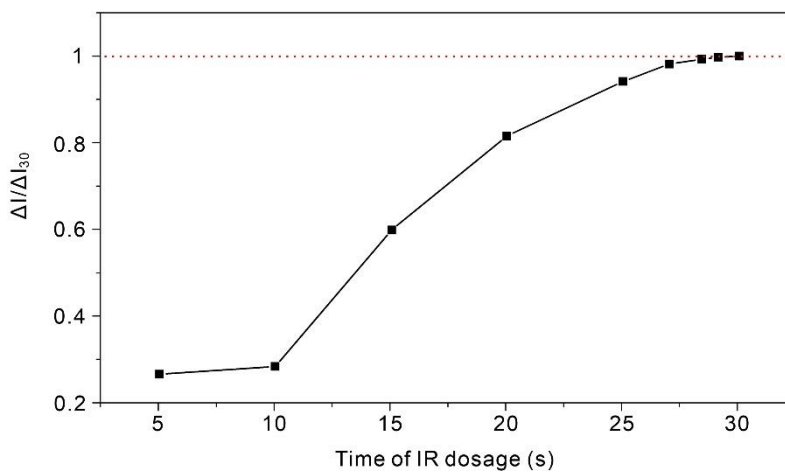

**Fig. S6.** Relative current change vs time of IR dosage.  $\Delta I_{30}$  is the current change corresponding to 30-s IR dosage.

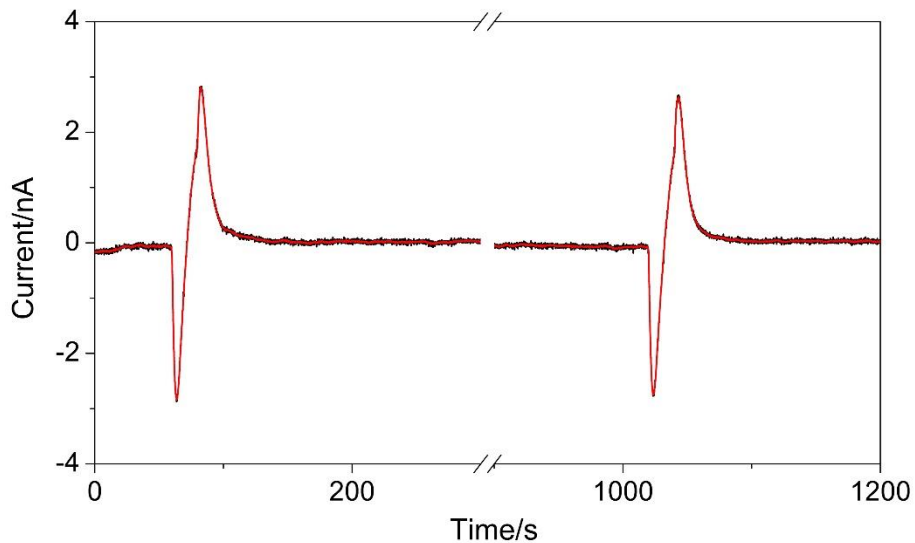

**Fig. S7.** Noise reduction of the electric response of the g-GOF under water vapor to IR using the adjacent-averaging method. The black line and red line are the original current and the current after noise reduction using the adjacent-averaging method with a moving average of 5 points, respectively.

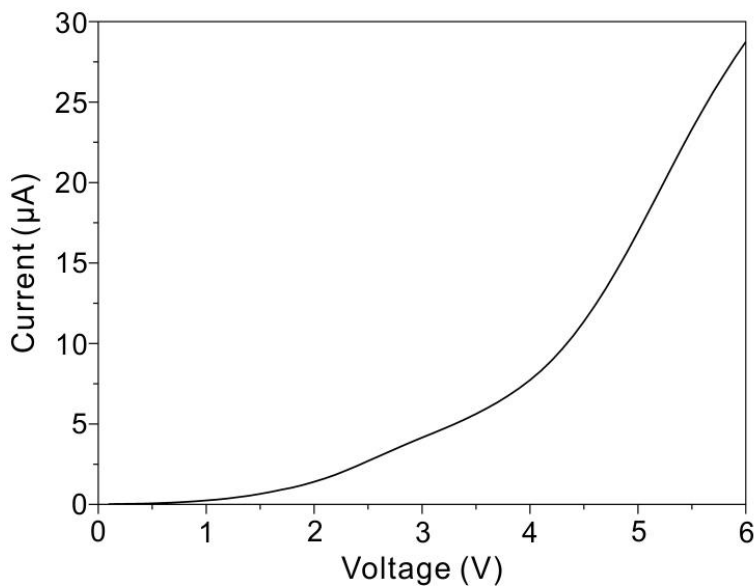

**Fig. S8.** I-V curve of the GOF under a RH of ~83%.

Table S1. Performance of IR detectors reported in literature

| Literature | Current responsivity (nA/W) | Response wavelength ( $\mu\text{m}$ ) |
|------------|-----------------------------|---------------------------------------|
| This work  | 1500                        | 1.5 - 7                               |
| [33]       | 88.5                        | 1.064                                 |
| [34]       | 78                          | 9.26                                  |
| [35]       | $\approx 400$               | 1.3                                   |

[33] H. Fang, C. Xu, J. Ding, Q. Li, J.-L. Sun, J.-Y. Dai, T.-L. Ren and Q. Yan, *ACS Appl. Mater. Interfaces*, 2016, **8**, 32934-32939.

[34] M. Badioli, A. Woessner, K.-J. Tielrooij, S. Nanot, G. Navickaite, T. Stauber, F. García de Abajo and F. H. Koppens, *Nano Lett.*, 2014, **14**, 6374-6381.

[35] B. Pradhan, K. Setyowati, H. Liu, D. H. Waldeck and J. Chen, *Nano Lett.*, 2008, **8**, 1142-1146.
